# Supplementary material
Source: PubMed Central journal article supplement (PMC4287222)

cleavage of Rab 4B proteins (arrow) following Resv treatment of Ramos.DR4 lymphoma cells. Cells were treated with vehicle alone or 50  $\mu$ M of Resv for 24 h, and subjected to western blotting for Rab 4B molecules. Actin was used as a loading control. (B) Ramos.DR4 cells treated with vehicle alone or Resv were also washed in cold PBS, and biotinylated with sulfo-NHS-SS-biotin and divided into three groups. Cells in group I were kept on ice while cell in group II were warmed (37°C for 15 min) to allow internalization of these biotin-labeled surface molecules, followed by cleavage of residual biotin from cell surface proteins with a glutathione solution as described in the methods. The biotin-labeled endocytosed class II proteins were then detected in a capture ELISA, and the percent endocytosis was calculated as described. Data are representative of triplicate wells, and is expressed as percent class II endocytosis/recycling  $\pm$  SEM.

**Supplemental Figure 1.** Resv induces apoptotic cell death in B-lymphoma cell lines.

(A) Nalm-6.DR4 and Ramos.DR4 cells were seeded at  $1 \times 10^5$  cells/well in 100  $\mu$ l of appropriate culture medium in a flat-bottom 96-well plate, and treated with Resv (50, 100, 200  $\mu$ M) for 24 h. Then 20  $\mu$ l of MTS solution was added to each well and incubated for another 2 h according to the manufacturer's protocol. The resulting colored solution was measured at 490 nm. Cells treated with vehicle alone were used as controls. The percent cell death induced by Resv was calculated using the equation:  $[(\text{Absorbance}_{\text{control}} - \text{Absorbance}_{\text{treated}}) / \text{Absorbance}_{\text{control}}] \times 100$ . The data shown are results of at least three separate experiments that were performed in triplicate wells. Error bars represent mean  $\pm$  S.D. (B) Nalm-6.DR4 cells were also treated with 50  $\mu$ M of Resv, and percent cell death was determined as described. (C) Nalm-6.DR4 and Ramos.DR4 were treated

with Resv (50  $\mu$ M and 100  $\mu$ M) or vehicle alone (control) for 24 h, and analyzed by western blotting for active caspase 9, and 3 protein expression as described in the methods. Arrows indicate cleaved (active) forms of caspases.  $\beta$ -actin was utilized as a loading control. Data are representative of three independent experiments. (D) Caspase inhibition assay was accomplished by the addition of 20  $\mu$ l of caspase inhibitor Z-VAD-FMK to GA-A (100  $\mu$ M and 200  $\mu$ M) or vehicle treatment of Nalm-6.DR4 cells for 24 h, followed by the MTS cell viability assay as described. Data are representative of three independent experiments with similar patterns, and error bars represent average  $\pm$  S.D.

**Supplemental Figure 2.** RT-PCR analysis of HLA-DR $\alpha$ , HLA-DR $\beta$  and CIITA mRNA expression in Resv-treated lymphoma cell lines. Nalm-6.DR4 and Ramos.DR4 cells were treated with vehicle alone or Resv (50  $\mu$ M) for 24 h, and total RNA was reverse-transcribed, amplified, and separated by electrophoresis. Specific products were detected in these cells by RT-PCR using specific primers to HLA-DR $\alpha$ , HLA-DR $\beta$  and CIITA. The amplification of  $\beta$ -actin was included as a control.

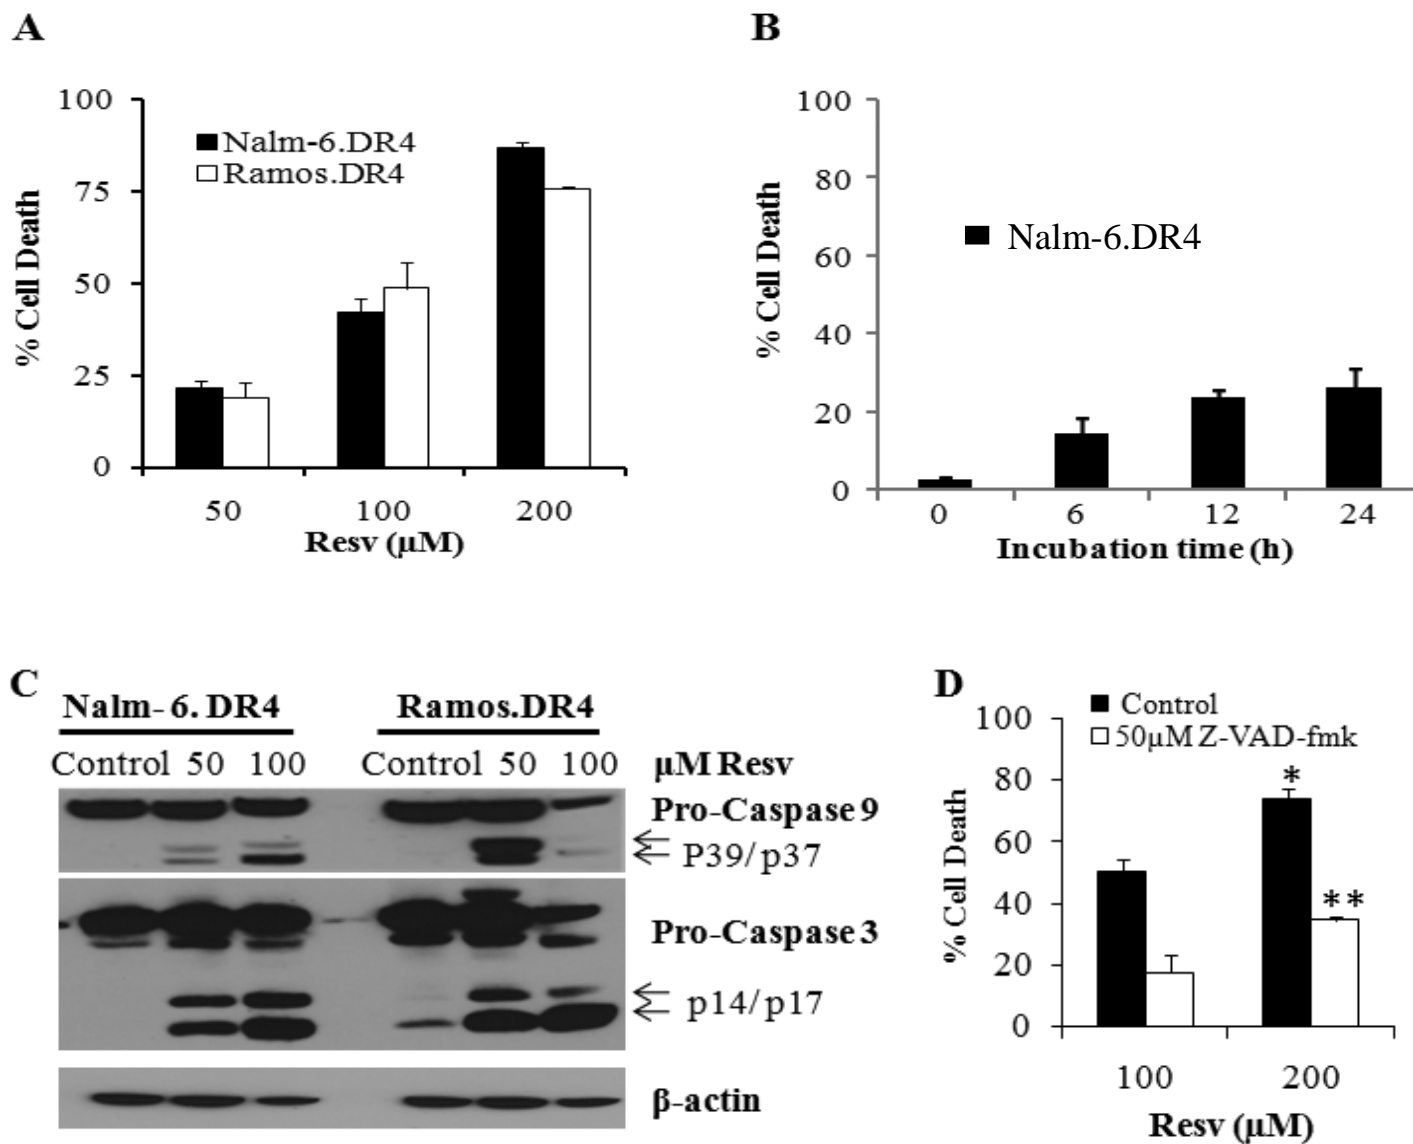

Radwan et al. Supplemental Figure 2

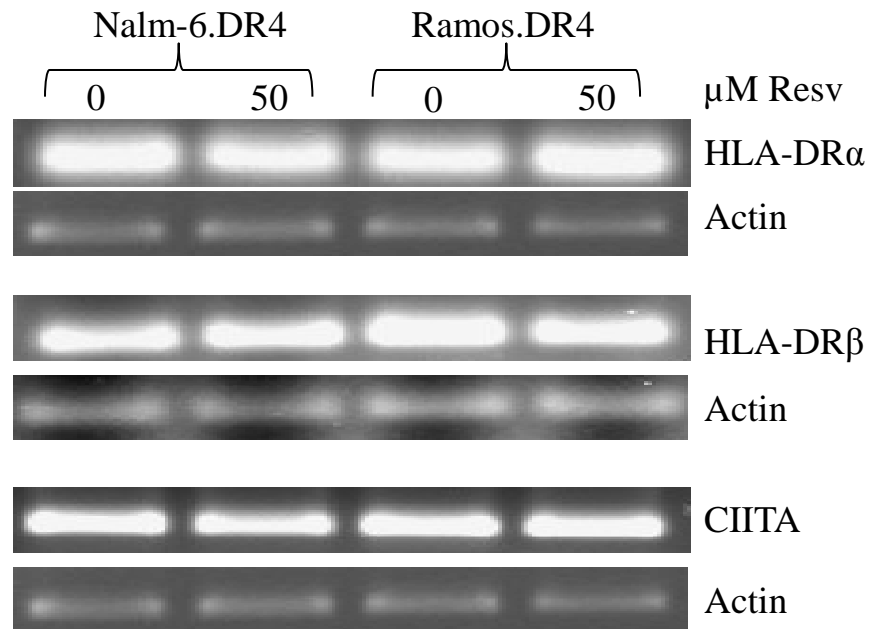

Supplement: NIHMS439627-supplement-supplement_1.pdf [file NIHMS439627-supplement-supplement_1.pdf]
